# Supplementary material for: Segregation and Crosstalk of D1 Receptor-Mediated Activation of ERK in Striatal Medium Spiny Neurons upon Acute Administration of Psychostimulants
Source: PubMed Central journal article supplement (PMC3907292; doi:10.1371/journal.pcbi.1003445), 2014-01-30
Supplement: pcbi.1003445.s006.pdf [file pcbi.1003445.s006.pdf]

**Table S1: Generating crosstalking schemes**

Table S1: Generation of the 8 crosstalking schemes by turning on/off forward rate constants of the interaction between different forms and pools of STEP (phosphorylated and non-phosphorylated) and its phosphorylated substrates (Fynp, NR2Bp and ERKpp). “Fynp” and “NMDARp” represent any phosphorylated forms of active Fyn and NMDAR. STEP2 is a second pool of STEP. The crosstalking schemes are encoded in two different forms. One (first row) with a 3 member binary vector (see main text) and the other (second row) according to the numbered edges depicted in Fig. 6A of the main text.

| <b>kf (nM<sup>-1</sup>·s<sup>-1</sup>)</b> | <b>Crosstalking scheme</b> |               |              |              |             |             |            |            |
|--------------------------------------------|----------------------------|---------------|--------------|--------------|-------------|-------------|------------|------------|
|                                            | <b>000</b>                 | <b>001</b>    | <b>010</b>   | <b>011</b>   | <b>100</b>  | <b>101</b>  | <b>110</b> | <b>111</b> |
|                                            | <b>135678</b>              | <b>234678</b> | <b>15678</b> | <b>25678</b> | <b>1357</b> | <b>2457</b> | <b>157</b> | <b>257</b> |
| <b>STEP*Fynp</b>                           | 0.0042                     | 0.0042        | 0.0042       | 0.0042       | 0.0042      | 0.0042      | 0.0042     | 0.0042     |
| <b>STEPp*Fynp</b>                          | 0.0042                     | 0.0042        | 0.0042       | 0.0042       | 0           | 0           | 0          | 0          |
| <b>STEP*NMDARp</b>                         | 0.0094                     | 0.0094        | 0.0094       | 0.0094       | 0.0094      | 0.0094      | 0.0094     | 0.0094     |
| <b>STEPp*NMDARp</b>                        | 0.0094                     | 0.0094        | 0.0094       | 0.0094       | 0           | 0           | 0          | 0          |
| <b>STEP*ERKpp</b>                          | 0.01                       | 0             | 0.01         | 0            | 0.01        | 0           | 0.01       | 0          |
| <b>STEPp*ERKpp</b>                         | 0.01                       | 0             | 0            | 0            | 0.01        | 0           | 0          | 0          |
| <b>STEP2*ERKpp</b>                         | 0                          | 0.01          | 0            | 0.01         | 0           | 0.01        | 0          | 0.01       |
| <b>STEP2p*ERKpp</b>                        | 0                          | 0.01          | 0            | 0            | 0           | 0.01        | 0          | 0          |
