# Supplementary material for: Segregation and Crosstalk of D1 Receptor-Mediated Activation of ERK in Striatal Medium Spiny Neurons upon Acute Administration of Psychostimulants
Source: PubMed Central journal article supplement (PMC3907292; doi:10.1371/journal.pcbi.1003445), 2014-01-30
Supplement: pcbi.1003445.s007.pdf [file pcbi.1003445.s007.pdf]

**Table S2: Rate parameters and total amounts**

The rate parameters and total amounts were taken from the literature whenever possible, but in most cases they resulted from the manual fitting of the model to phenotypic data. Thus, most of the references in the last column of the following tables are a guide to the edges but not their weight. The reactions were color coded as a function of the sub-network they belong to.

|  |                                                                                 |
|--|---------------------------------------------------------------------------------|
|  | <b>D1R and G-protein activation cycle. Compartmental distribution.</b>          |
|  | <b>Generation, hydrolysis and effectors of cAMP.</b>                            |
|  | <b>D32 sub-network.</b>                                                         |
|  | <b>Activation and inactivation of most Ca<sup>2+</sup> binding proteins.</b>    |
|  | <b>PKA substrates phosphorylation and dephosphorylation, except NMDAR.</b>      |
|  | <b>Activation cycle of Fyn.</b>                                                 |
|  | <b>Tyrosine phosphorylation, dephosphorylation and traffic of NMDAR (NR2B).</b> |
|  | <b>Phosphorylation and dephosphorylation of NMDAR (NR1) by PKA.</b>             |
|  | <b>MAPK cascade and DUSP negative feedback.</b>                                 |

**Enzymatic reactions**

| ID     | Reaction                                                                 | kf (nM <sup>-1</sup> s <sup>-1</sup> ) | kr (s <sup>-1</sup> ) | kcat (s <sup>-1</sup> ) | References |
|--------|--------------------------------------------------------------------------|----------------------------------------|-----------------------|-------------------------|------------|
| enz:79 | AC5GaolfGTP + ATP <-> AC5GaolfGTP*ATP -> AC5GaolfGTP + cAMP              | 0.006                                  | 96                    | 24                      | [1–5]      |
| enz:80 | AC5 + ATP <-> AC5*ATP -> AC5 + cAMP                                      | 0.00025                                | 4                     | 1                       | [1–5]      |
| enz:81 | AC5CaGaolfGTP + ATP <-> AC5CaGaolfGTP*ATP -> AC5CaGaolfGTP + cAMP        | 0.003                                  | 48                    | 12                      | [1–5]      |
| enz:82 | AC5Ca + ATP <-> AC5Ca*ATP -> AC5Ca + cAMP                                | 0.000125                               | 2                     | 0.5                     | [1–5]      |
| enz:1  | PDE1c + cAMP <-> PDE1c*cAMP -> PDE1c + AMP                               | 0.0046                                 | 44                    | 11                      | [1]        |
| enz:2  | PDE4p + cAMP <-> PDE4p*cAMP -> PDE4p + AMP                               | 0.25                                   | 40                    | 10                      | [1]        |
| enz:31 | PDE4 + cAMP <-> PDE4*cAMP -> PDE4 + AMP                                  | 0.083                                  | 8                     | 2                       | [6]        |
| enz:30 | PKAc + PDE4 <-> PKAc*PDE4 -> PKAc + PDE4p                                | 0.014                                  | 40                    | 10                      | [6]        |
| enz:58 | PDE4PPase + PDE4p <-> PDE4PPase*PDE4p -> PDE4PPase + PDE4                | 0.033                                  | 8                     | 2                       | [6]        |
| enz:56 | PDE10 + cAMP <-> PDE10*cAMP -> PDE10 + AMP                               | 0.083                                  | 8                     | 2                       | [7–9]      |
| enz:57 | PDE10c + cAMP <-> PDE10c*cAMP -> PDE10c + AMP                            | 0.5                                    | 40                    | 10                      | [7–9]      |
| enz:3  | PKAc + D32 <-> PKAc*D32 -> PKAc + D32p34                                 | 0.0047                                 | 28                    | 7                       | [1]        |
| enz:9  | PP2Bc + D32p34 <-> PP2Bc*D32p34 -> PP2Bc + D32                           | 0.021                                  | 6                     | 1.5                     | [1]        |
| enz:10 | PP2Bc + PP1D32p34 <-> PP2Bc*PP1D32p34 -> PP2Bc + PP1 + D32               | 0.017                                  | 4                     | 1                       | [1]        |
| enz:11 | B72PP2A + D32p34 <-> B72PP2A*D32p34 -> B72PP2A + D32                     | 0.0024                                 | 0.4                   | 0.1                     | [1]        |
| enz:12 | B72PP2A + PP1D32p34 <-> B72PP2A*PP1D32p34 -> B72PP2A + PP1 + D32         | 0.000062                               | 0.4                   | 0.1                     | [1]        |
| enz:24 | B72PP2ACa + D32p34 <-> B72PP2ACa*D32p34 -> B72PP2ACa + D32               | 0.0024                                 | 0.4                   | 0.1                     | [1]        |
| enz:25 | B72PP2ACa + PP1D32p34 <-> B72PP2ACa*PP1D32p34 -> B72PP2ACa + PP1 + D32   | 0.000062                               | 0.4                   | 0.1                     | [1]        |
| enz:5  | CDK5 + D32 <-> CDK5*D32 -> CDK5 + D32p75                                 | 0.0011                                 | 8                     | 2                       | [1]        |
| enz:23 | B56PP2A + D32p75 <-> B56PP2A*D32p75 -> B56PP2A + D32                     | 0.00047                                | 6                     | 1.5                     | [1,10]     |
| enz:6  | B56PP2Ap + D32p75 <-> B56PP2Ap*D32p75 -> B56PP2Ap + D32                  | 0.002                                  | 32                    | 8                       | [1,10]     |
| enz:7  | B72PP2A + D32p75 <-> B72PP2A*D32p75 -> B72PP2A + D32                     | 0.000068                               | 4                     | 1                       | [11,12]    |
| enz:8  | B72PP2ACa + D32p75 <-> B72PP2ACa*D32p75 -> B72PP2ACa + D32               | 0.0017                                 | 24                    | 6                       | [11,12]    |
| enz:77 | PP1 + CaMKIIc <-> PP1*CaMKIIc -> PP1 + CaMKCa4CaMKII                     | 0.000039                               | 0.34                  | 0.086                   | [12]       |
| enz:78 | PP1 + CaMKIIp <-> PP1*CaMKIIp -> PP1 + CaMKII                            | 0.000039                               | 0.34                  | 0.086                   | [12]       |
| enz:14 | PKAc + STEP <-> PKAc*STEP -> PKAc + STEPp                                | 0.014                                  | 40                    | 10                      | [13]       |
| enz:13 | PP1 + STEPp <-> PP1*STEPp -> PP1 + STEP                                  | 0.0029                                 | 32                    | 8                       | [14]       |
| enz:83 | PKAc + STEP2 <-> PKAc*STEP2 -> PKAc + STEP2p                             | 0.014                                  | 40                    | 10                      | [13]       |
| enz:84 | PP1 + STEP2p <-> PP1*STEP2p -> PP1 + STEP2                               | 0.0029                                 | 32                    | 8                       | [14]       |
| enz:54 | PKAc + GluR1 <-> PKAc*GluR1 -> PKAc + GluR1p                             | 0.08                                   | 40                    | 10                      | [12]       |
| enz:55 | PP1 + GluR1p <-> PP1*GluR1p -> PP1 + GluR1                               | 0.035                                  | 9.6                   | 2.4                     | [12]       |
| enz:4  | PKAc + B56PP2A <-> PKAc*B56PP2A -> PKAc + B56PP2Ap                       | 0.0013                                 | 0.4                   | 0.1                     | [1,10]     |
| enz:47 | STEP + Fynpa <-> STEP*Fynpa -> STEP + Fyn                                | 0.0042                                 | 4                     | 1                       | [15]       |
| enz:51 | STEPp + Fynpa <-> STEPp*Fynpa -> STEPp + Fyn                             | 0.0042                                 | 4                     | 1                       | [15]       |
| enz:39 | FynpiGolf + FynpiGolf <-> FynpiGolf*FynpiGolf -> FynpapiGolf + FynpiGolf | 0.083                                  | 0.8                   | 0.2                     | [16–19]    |
| enz:36 | STEP + Fynpapi <-> STEP*Fynpapi -> STEP + Fynpi                          | 0.0042                                 | 4                     | 1                       | [15]       |

|        |                                                                             |          |      |       |            |
|--------|-----------------------------------------------------------------------------|----------|------|-------|------------|
| enz:50 | <b>STEPp + Fynpapi &lt;-&gt; STEPp*Fynpapi -&gt; STEPp + Fynpi</b>          | 0.0042   | 4    | 1     | [15]       |
| enz:40 | Csk + Fyn <-> Csk*Fyn -> Csk + Fynpi                                        | 0.13     | 20   | 5     | [16–18]    |
| enz:48 | PTPa + Fynpi <-> PTPa*Fynpi -> PTPa + Fyn                                   | 0.00096  | 0.8  | 0.2   | [16–18]    |
| enz:41 | Csk + Fynpa <-> Csk*Fynpa -> Csk + Fynpapi                                  | 0.13     | 20   | 5     | [16–18]    |
| enz:49 | PTPa + Fynpapi <-> PTPa*Fynpapi -> PTPa + Fynpa                             | 0.00096  | 0.8  | 0.2   | [16–18]    |
| enz:43 | Fyn + NMDARi <-> Fyn*NMDARi -> Fyn + NMDARipY                               | 0.017    | 40   | 10    | [16,20,21] |
| enz:45 | Fynpa + NMDARi <-> Fynpa*NMDARi -> Fynpa + NMDARipY                         | 0.017    | 40   | 10    | [16,20,21] |
| enz:34 | Fynpapi + NMDARi <-> Fynpapi*NMDARi -> Fynpapi + NMDARipY                   | 0.017    | 40   | 10    | [16,20,21] |
| enz:38 | STEP + NMDARipY <-> STEP*NMDARipY -> STEP + NMDARi                          | 0.0094   | 12   | 3     | [22,23]    |
| enz:52 | <b>STEPp + NMDARipY &lt;-&gt; STEPp*NMDARipY -&gt; STEPp + NMDARi</b>       | 0.0094   | 12   | 3     | [22,23]    |
| enz:44 | Fyn + NMDARm <-> Fyn*NMDARm -> Fyn + NMDARmpY                               | 0.017    | 40   | 10    | [16,20,21] |
| enz:46 | Fynpa + NMDARm <-> Fynpa*NMDARm -> Fynpa + NMDARmpY                         | 0.017    | 40   | 10    | [16,20,21] |
| enz:35 | Fynpapi + NMDARm <-> Fynpapi*NMDARm -> Fynpapi + NMDARmpY                   | 0.017    | 40   | 10    | [16,20,21] |
| enz:37 | STEP + NMDARmpY <-> STEP*NMDARmpY -> STEP + NMDARm                          | 0.0094   | 12   | 3     | [22,23]    |
| enz:53 | <b>STEPp + NMDARmpY &lt;-&gt; STEPp*NMDARmpY -&gt; STEPp + NMDARm</b>       | 0.0094   | 12   | 3     | [22,23]    |
| enz:69 | Fyn + NMDARipS <-> Fyn*NMDARipS -> Fyn + NMDARipYpS                         | 0.017    | 40   | 10    | [16,20,21] |
| enz:70 | Fynpa + NMDARipS <-> Fynpa*NMDARipS -> Fynpa + NMDARipYpS                   | 0.017    | 40   | 10    | [16,20,21] |
| enz:71 | Fynpapi + NMDARipS <-> Fynpapi*NMDARipS -> Fynpapi + NMDARipYpS             | 0.017    | 40   | 10    | [16,20,21] |
| enz:67 | STEP + NMDARipYpS <-> STEP*NMDARipYpS -> STEP + NMDARipS                    | 0.0094   | 12   | 3     | [22,23]    |
| enz:68 | <b>STEPp + NMDARipYpS &lt;-&gt; STEPp*NMDARipYpS -&gt; STEPp + NMDARipS</b> | 0.0094   | 12   | 3     | [22,23]    |
| enz:74 | Fyn + NMDARmpS <-> Fyn*NMDARmpS -> Fyn + NMDARmpYpS                         | 0.017    | 40   | 10    | [16,20,21] |
| enz:73 | Fynpa + NMDARmpS <-> Fynpa*NMDARmpS -> Fynpa + NMDARmpYpS                   | 0.017    | 40   | 10    | [16,20,21] |
| enz:72 | Fynpapi + NMDARmpS <-> Fynpapi*NMDARmpS -> Fynpapi + NMDARmpYpS             | 0.017    | 40   | 10    | [16,20,21] |
| enz:75 | STEP + NMDARmpYpS <-> STEP*NMDARmpYpS -> STEP + NMDARmpS                    | 0.0094   | 12   | 3     | [22,23]    |
| enz:76 | <b>STEPp + NMDARmpYpS &lt;-&gt; STEPp*NMDARmpYpS -&gt; STEPp + NMDARmpS</b> | 0.0094   | 12   | 3     | [22,23]    |
| enz:59 | PKAc + NMDARm <-> PKAc*NMDARm -> PKAc + NMDARmpS                            | 0.017    | 8    | 2     | [24]       |
| enz:60 | PP1 + NMDARmpS <-> PP1*NMDARmpS -> PP1 + NMDARm                             | 0.017    | 8    | 2     | [25]       |
| enz:61 | PKAc + NMDARmpY <-> PKAc*NMDARmpY -> PKAc + NMDARmpYpS                      | 0.017    | 8    | 2     | [24]       |
| enz:62 | PP1 + NMDARmpYpS <-> PP1*NMDARmpYpS -> PP1 + NMDARmpY                       | 0.017    | 8    | 2     | [25]       |
| enz:64 | PKAc + NMDARi <-> PKAc*NMDARi -> PKAc + NMDARipS                            | 0.017    | 8    | 2     | [24]       |
| enz:63 | PP1 + NMDARipS <-> PP1*NMDARipS -> PP1 + NMDARi                             | 0.017    | 8    | 2     | [25]       |
| enz:66 | PKAc + NMDARipY <-> PKAc*NMDARipY -> PKAc + NMDARipYpS                      | 0.017    | 8    | 2     | [24]       |
| enz:65 | PP1 + NMDARipYpS <-> PP1*NMDARipYpS -> PP1 + NMDARipY                       | 0.017    | 8    | 2     | [25]       |
| enz:22 | RASGTP + GAPRAS <-> GAPRAS*RASGTP -> GAPRAS + RASGDP                        | 0.00089  | 0.36 | 0.09  | [26–28]    |
| enz:29 | RAFc + GAPRAS <-> GAPRAS*RAFc -> GAPRAS + RAF + RASGDP                      | 0.00089  | 0.36 | 0.09  | [26–28]    |
| enz:19 | RAFc + MEKp <-> RAFc*MEKp -> RAFc + MEKc                                    | 0.0094   | 1.2  | 0.3   | [29,30]    |
| enz:18 | MKKP + MEKp <-> MKKP*MEKp -> MKKP + MEK                                     | 0.0019   | 24   | 6     | [29,30]    |
| enz:20 | RAFc + MEK <-> RAFc*MEK -> RAFc + MEKp                                      | 0.0094   | 1.2  | 0.3   | [29,30]    |
| enz:17 | MKKP + MEKc <-> MKKP*MEKc -> MKKP + MEKp                                    | 0.0019   | 24   | 6     | [29,30]    |
| enz:21 | MEKc + ERK <-> MEKc*ERK -> MEKc + ERKpT                                     | 0.032    | 1.2  | 0.3   | [29,30]    |
| enz:28 | DUSP1 + ERKpT <-> DUSP1*ERKpT -> DUSP1 + ERK                                | 0.0011   | 4    | 1     | [29,30]    |
| enz:32 | B56PP2A + ERKpT <-> B56PP2A*ERKpT -> B56PP2A + ERK                          | 0.000005 | 0.04 | 0.01  | [31,32]    |
| enz:33 | B56PP2Ap + ERKpT <-> B56PP2Ap*ERKpT -> B56PP2Ap + ERK                       | 0.000005 | 0.04 | 0.01  | [31,32]    |
| enz:15 | MEKc + ERKpT <-> MEKc*ERKpT -> MEKc + ERKpp                                 | 0.032    | 1.2  | 0.3   | [29,30]    |
| enz:27 | DUSP1 + ERKpp <-> DUSP1*ERKpp -> DUSP1 + ERKpT                              | 0.0011   | 4    | 1     | [29,30]    |
| enz:16 | STEP + ERKpp <-> STEP*ERKpp -> STEP + ERKpT                                 | 0.01     | 2.4  | 0.6   | [13,32]    |
| enz:87 | <b>STEPp + ERKpp &lt;-&gt; STEPp*ERKpp -&gt; STEPp + ERKpT</b>              | 0        | 2.4  | 0.6   | [13,32]    |
| enz:85 | <b>STEP2 + ERKpp &lt;-&gt; STEP2*ERKpp -&gt; ERKpT + STEP2</b>              | 0        | 2.4  | 0.6   | [13,32]    |
| enz:86 | <b>STEP2p + ERKpp &lt;-&gt; STEP2p*ERKpp -&gt; STEP2p + ERKpT</b>           | 0        | 2.4  | 0.6   | [13,32]    |
| enz:26 | TF + ERKpp <-> ERKc*TF -> TFc + ERKpp                                       | 0.000021 | 0.1  | 0.025 | [33]       |

Reactions in bold are run depending of the crosstalking scheme. Table S1 defines which reactions are activated in each crosstalking scheme. They are matched via the name of the Michaelis-Menten complex where Fynp and NMDARp in Table S1 represent any phosphorylated forms of active Fyn and NMDAR in SM2. The scheme 010 is the default one where none of these reactions in bold is active (kf = 0).

## Reversible reactions

| ID     | Reaction                                   | kf (nM-1s-1)   | kr (s-1) | References |
|--------|--------------------------------------------|----------------|----------|------------|
| rev:4  | D1R + DA <-> D1RDA                         | 0.00025        | 10       | [34,35]    |
| rev:1  | D1RG + DA <-> D1RDAGolf                    | 0.005          | 2        | [34,35]    |
| rev:3  | D1R + Golf <-> D1RG                        | 0.0005         | 1        | [34,35]    |
| rev:2  | D1RDA + Golf <-> D1RDAGolf                 | 0.05           | 1        | [34,35]    |
| rev:31 | D1Rm + DA <-> D1RmDa                       | 0.00025        | 10       | [34,35]    |
| rev:33 | D1RmGolf + DA <-> D1RmDaGolf               | 0.005          | 2        | [34,35]    |
| rev:32 | D1Rm + Golfm <-> D1RmGolf                  | 0.0005         | 1        | [34,35]    |
| rev:34 | D1RmDa + Golfm <-> D1RmDaGolf              | 0.05           | 1        | [34,35]    |
| rev:28 | AD1R + D1Rpool <-> D1R                     | 0.1            | 0.1      | -          |
| rev:36 | AD1Rm + D1Rpool <-> D1Rm                   | 0.000002       | 0.01     | -          |
| rev:29 | AGolf + Golfpool <-> Golf                  | 0.000006       | 0.1      | -          |
| rev:35 | AGolfm + Golfpool <-> Golfm                | 0.0005         | 0.1      | -          |
| rev:21 | AC5 + Ca <-> AC5Ca                         | 0.001          | 0.9      | [1]        |
| rev:41 | AC5*ATP + Ca <-> AC5Ca*ATP                 | 0.001          | 0.9      | [1]        |
| rev:5  | AC5 + GaolfGTP <-> AC5GaolfGTP             | 0.00033        | 0.01     | [1,36]     |
| rev:22 | AC5Ca + GaolfGTP <-> AC5CaGaolfGTP         | 0.00033        | 0.01     | [1,36]     |
| rev:39 | AC5*ATP + GaolfGTP <-> AC5GaolfGTP*ATP     | 0.00033        | 0.01     | [1,36]     |
| rev:40 | AC5Ca*ATP + GaolfGTP <-> AC5CaGaolfGTP*ATP | 0.00033        | 0.01     | [1,36]     |
| rev:7  | PDE1 + CaMca4 <-> PDE1c                    | 0.1            | 1        | [1]        |
| rev:37 | PDE10 + 2 cAMP <-> PDE10c                  | 0.000001 (*)   | 9        | [7-9]      |
| rev:25 | PKA + cAMP <-> PKAcAMP2                    | 0.00026        | 0.06     | [1]        |
| rev:26 | PKAcAMP2 + cAMP <-> PKAcAMP4               | 0.00035        | 0.6      | [1]        |
| rev:27 | PKAcAMP4 <-> PKAc + PKAreg                 | 0.001          | 0.096    | [1]        |
| rev:12 | D32p75 + PKAc <-> PKAcD32p75               | 0.00037        | 1        | [1]        |
| rev:11 | D32p34 + PP1 <-> PP1D32p34                 | 0.4            | 0.58     | [1]        |
| rev:13 | B72PP2A + Ca <-> B72PPA2Ca                 | 0.0001         | 0.1      | [11,12]    |
| rev:6  | CaM + Ca <-> CaMca2                        | 0.006          | 9.1      | [1]        |
| rev:14 | CaMca2 + Ca <-> CaMca4                     | 0.1            | 1000     | [1]        |
| rev:8  | PP2B + CaM <-> PP2BCaM                     | 1              | 3        | [1]        |
| rev:9  | PP2B + CaMca4 <-> PP2Bc                    | 1              | 0.3      | [1]        |
| rev:15 | PP2BCaM + Ca <-> PP2BCaMca2                | 0.006          | 0.91     | [1]        |
| rev:16 | PP2BCaMca2 + Ca <-> PP2Bc                  | 0.1            | 10       | [1]        |
| rev:17 | PP2B + CaMca2 <-> PP2BCaMca2               | 1              | 0.3      | [1]        |
| rev:10 | CaMKII + CaMca4 <-> CaMca4CaMKII           | 0.00075        | 0.1      | [1]        |
| rev:38 | CaMKIIc <-> CaMca4 + CaMKIIp               | 0.013          | 0.0008   | [1]        |
| rev:30 | Gbgolfm + Fynpi <-> FynpiGolf              | 0.05           | 5        | -          |
| rev:23 | RASGRF1 + 4 Ca <-> GRFRASc                 | 0.0000001 (**) | 1000000  | [26-28]    |
| rev:18 | RASGTP + RASGRF1c <-> RASGRF1cRASGTP       | 0.1            | 17       | [37-39]    |
| rev:20 | RASGDP + RASGRF1c <-> RASGRF1cRASGDP       | 0.1            | 17       | [37-39]    |
| rev:19 | RASGTP + RAF <-> RAFc                      | 0.09           | 5        | [26-28]    |
| rev:24 | 2 TFc + DNA <-> TFDNA                      | 0.01(2)        | 1        | [33]       |

\* nM<sup>-2</sup>s<sup>-1</sup>, \*\*nM<sup>-4</sup>s<sup>-1</sup>

## Irreversible reactions

| ID     | Reaction                                   | k (s <sup>-1</sup> ) | References |
|--------|--------------------------------------------|----------------------|------------|
| irr:1  | GaolfGTP -> GaolfGDP                       | 1                    | [40]       |
| irr:17 | GaolfmGTP -> GaolfmGDP                     | 1                    | [40]       |
| irr:2  | D1RDAGolf -> Gbgolf + D1RDA + GaolfGTP     | 2                    | [41]       |
| irr:16 | D1RmDaGolf -> D1RmDa + GaolfmGTP + Gbgolfm | 2                    | [41]       |
| irr:18 | Gbgolfm + GaolfmGDP -> Golfm               | 100                  | [1]        |
| irr:26 | GaolfGDP + Gbgolf -> Golf                  | 100                  | [1]        |
| irr:27 | cAMP + AC5GaolfGTP -> AC5GaolfGTP*ATP      | 0.006                | [1]        |
| irr:28 | cAMP + AC5 -> AC5*ATP                      | 0.000125             | [1]        |
| irr:29 | cAMP + AC5Ca -> AC5Ca*ATP                  | 0.00025              | [1]        |
| irr:30 | cAMP + AC5CaGaolfGTP -> AC5CaGaolfGTP*ATP  | 0.003                | [1]        |
| irr:3  | CaM <sub>Ca</sub> 4CaMKII -> CaMKIIc       | 0.005                | [12]       |
| irr:10 | B56PP2Ap -> B56PP2A                        | 0.004                | [1,10]     |
| irr:21 | NMDARm -> NMDARi                           | 0.002                | [42-46]    |
| irr:22 | NMDARi -> NMDARm                           | 0.00001              | [42-46]    |
| irr:23 | NMDARipS -> NMDARmpS                       | 0.00001              | [42-46]    |
| irr:24 | NMDARmpS -> NMDARipS                       | 0.002                | [42-46]    |
| irr:25 | NMDARipYpS -> NMDARmpYpS                   | 0.002                | [42-46]    |
| irr:19 | FynpapiGolf -> Fynpapi + Gbgolfm           | 50                   | -          |
| irr:4  | RASGRF1cRAS -> RASGRF1cRASGDP              | 4                    | [37-39]    |
| irr:5  | RASGRF1cRAS -> RASGRF1cRASGTP              | 20                   | [37-39]    |
| irr:8  | RASGRF1cRASGTP -> RASGRF1cRAS              | 5                    | [37-39]    |
| irr:9  | RASGRF1cRASGDP -> RASGRF1cRAS              | 5                    | [37-39]    |
| irr:6  | RAFc -> RAF + RASGDP                       | 0.00045              | [47]       |
| irr:7  | RASGTP -> RASGDP                           | 0.00045              | [47]       |
| irr:11 | TFc -> TF                                  | 0.05                 | [33]       |
| irr:12 | TFDNA + Nucleotides -> TFDNA + DUSP1mRNA   | 0.03                 | [33]       |
| irr:13 | DUSP1mRNA + aa -> DUSP1 + DUSP1mRNA        | 0.06                 | [33]       |
| irr:15 | DUSP1mRNA -> Nucleotides                   | 0.0003               | [33]       |
| irr:14 | DUSP1 -> aa                                | 0.00037              | [33]       |

## Total amounts

| <b>N</b> | <b>Species</b> | <b>Total amount</b> |
|----------|----------------|---------------------|
| 1        | Ca             | 60                  |
| 2        | DA             | 10                  |
| 3        | D1Rpool        | 7000                |
| 4        | Golfpool       | 5000                |
| 5        | AD1R           | 700                 |
| 6        | AD1Rm          | 900                 |
| 7        | AGolf          | 2000                |
| 8        | AGolfm         | 500                 |
| 9        | ATP            | 5000000             |
| 10       | AC5            | 400                 |
| 11       | PDE1           | 3000                |
| 12       | PDE4           | 1000                |
| 13       | PDE4PPase      | 50                  |
| 14       | PDE10          | 1000                |
| 15       | PKA            | 1200                |
| 16       | CDK5           | 1800                |
| 17       | DARPP32        | 50000               |
| 18       | PP1            | 1000                |
| 19       | B56PP2A        | 2000                |
| 20       | B72PP2A        | 2000                |
| 21       | PP2B           | 4000                |
| 22       | CaM            | 10000               |
| 23       | CaMKII         | 20000               |
| 24       | Fyn            | 300                 |
| 25       | PTPa           | 300                 |
| 26       | Csk            | 50                  |
| 27       | STEP           | 300                 |
| 28       | STEP2          | 300                 |
| 29       | NMDAR          | 1000                |
| 30       | GluR1          | 3000                |
| 31       | RasGRF1        | 800                 |
| 32       | GAPRAS         | 300                 |
| 33       | RAS            | 500                 |
| 34       | RAF            | 400                 |
| 35       | MEK            | 500                 |
| 36       | MKKP           | 1000                |
| 37       | ERK            | 3600                |
| 38       | TF             | 50                  |
| 39       | DNA            | 1                   |
| 40       | Nucleotides    | 1                   |
| 41       | aa             | 1                   |

## References

1. Lindskog M, Kim M, Wikström M a, Blackwell KT, Kotaleski JH (2006) Transient calcium and dopamine increase PKA activity and DARPP-32 phosphorylation. *PLoS Comput Biol* 2: e119. doi:10.1371/journal.pcbi.0020119.
2. Dessauer C, Gilman A (1997) The catalytic mechanism of mammalian adenylyl cyclase. Equilibrium binding and kinetic analysis of P-site inhibition. *J Biol Chem* 272: 27787–27795.
3. Zalduegui A, López de Jesús M, Callado LF, Meana JJ, Sallés J (2011) Levels of Gs $\alpha$ ((short and long)), G $\alpha$ (olf) and G $\beta$ ((common)) subunits, and calcium-sensitive adenylyl cyclase isoforms (1, 5/6, 8) in post-mortem human brain caudate and cortical membranes: Comparison with rat brain membranes and potential stoichiometric rel. *Neurochem Int* 58: 180–189. doi:10.1016/j.neuint.2010.11.014.
4. Chen-Goodspeed M, Lukan AN, Dessauer C (2005) Modeling of Galpha(s) and Galpha(i) regulation of human type V and VI adenylyl cyclase. *J Biol Chem* 280: 1808–1816. doi:10.1074/jbc.M409172200.
5. Sadana R, Dascal N, Dessauer C (2009) N Terminus of Type 5 Adenylyl Cyclase Scaffolds Gs Heterotrimer. *Mol Pharmacol* 76: 1256–1264. doi:10.1124/mol.109.058370.
6. Murthy KS, Zhou H, Makhlof GM (2002) PKA-dependent activation of PDE3A and PDE4 and inhibition of adenylyl cyclase V/VI in smooth muscle. *Am J Physiol Cell Physiol* 282: C508–17. doi:10.1152/ajpcell.00373.2001.
7. Fujishige K, Kotera J, Omori K (1999) Striatum- and testis-specific phosphodiesterase PDE10A Isolation and characterization of a rat PDE10A. *Eur J Biochem* 266: 1118–1127.
8. Jäger R, Russwurm C, Schwede F, Genieser H-G, Koesling D, et al. (2012) Activation of PDE10 and PDE11 phosphodiesterases. *J Biol Chem* 287: 1210–1219. doi:10.1074/jbc.M111.263806.
9. Nishi A, Kuroiwa M, Miller DB, O’Callaghan JP, Bateup HS, et al. (2008) Distinct roles of PDE4 and PDE10A in the regulation of cAMP/PKA signaling in the striatum. *J Neurosci* 28: 10460–10471. doi:10.1523/JNEUROSCI.2518-08.2008.
10. Ahn J-H, Mcavoy T, Rakhilin S V, Nishi A, Greengard P, et al. (2007) Protein kinase A activates protein phosphatase 2A by phosphorylation of the B56d subunit. *PNAS* 104: 2979–2984.
11. Ahn J-H, Sung JY, McAvoy T, Nishi A, Janssens V, et al. (2007) The B $\gamma$ -PR72 subunit mediates Ca $^{2+}$ -dependent dephosphorylation of DARPP-32 by protein phosphatase 2A. *PNAS* 104: 9876–9881.
12. Oliveira RF, Kim M, Blackwell KT (2012) Subcellular Location of PKA Controls Striatal Plasticity: Stochastic Simulations in Spiny Dendrites. *PLoS Comput Biol* 8: e1002383. doi:10.1371/journal.pcbi.1002383.
13. Paul S, Snyder G, Yokakura H, Picciotto M, Nairn A, et al. (2000) The Dopamine/D1 receptor mediates the phosphorylation and inactivation of the protein tyrosine phosphatase STEP via a PKA-dependent pathway. *J Neurosci* 20: 5630–5638.

14. Nika K, Hyunh H, Williams S, Paul S, Bottini N, et al. (2004) Haematopoietic protein tyrosine phosphatase (HePTP) phosphorylation by cAMP-dependent protein kinase in T-cells: dynamics and subcellular location. *Biochem J* 378: 335–342. doi:10.1042/BJ20031244.
15. Nguyen T, Liu J, Lombroso PJ (2002) Striatal Enriched Phosphatase 61 Dephosphorylates Fyn at Phosphotyrosine 420. *Biochemistry* 277: 24274–24279. doi:10.1074/jbc.M111683200.
16. Sun G, Sharma AK, Budde RJA (1998) Autophosphorylation of Src and Yes blocks their inactivation by Csk phosphorylation. *Oncogene* 17: 1587–1595.
17. Sun G, Ramdas L, Wang W, Vinci J, McMurray J, et al. (2002) Effect of Autophosphorylation on the Catalytic and Regulatory Properties of Protein Tyrosine Kinase Src. *Arch Biochem Biophys* 397: 11–17. doi:10.1006/abbi.2001.2627.
18. Salter MW, Kalia L V (2004) Src kinases: a hub for NMDA receptor regulation. *Nat Rev Neurosci* 5: 317–328. doi:10.1038/nrn1368.
19. Pascoli V, Besnard A, Hervé D, Pagès C, Heck N, et al. (2010) Cyclic Adenosine Monophosphate-Independent Tyrosine Phosphorylation of NR2B Mediates Cocaine-Induced Extracellular Signal-Regulated Kinase Activation. *Biol Psychiatry* 69: 218–227. doi:10.1016/j.biopsych.2010.08.031.
20. Nakazawa T, Komai S, Tezuka T, Hisatsune C, Umemori H, et al. (2001) Characterization of Fyn-mediated tyrosine phosphorylation sites on GluR epsilon 2 (NR2B) subunit of the N-methyl-D-aspartate receptor. *J Biol Chem* 276: 693–699. doi:10.1074/jbc.M008085200.
21. Yu X, Askalan R, II GJK, Salter MW (1997) NMDA Channel Regulation by Channel-Associated Protein Tyrosine Kinase Src. *Science* (80- ) 275: 674–678. doi:10.1126/science.275.5300.674.
22. Braithwaite SP, Adkisson M, Leung J, Nava A, Masterson B, et al. (2006) Regulation of NMDA receptor trafficking and function by striatal-enriched tyrosine phosphatase (STEP). *Eur J Neurosci* 23: 2847–2856. doi:10.1111/j.1460-9568.2006.04837.x.
23. Pelkey KA, Askalan R, Paul S, Kalia L V, Nguyen TH, et al. (2002) Tyrosine phosphatase STEP is a tonic brake on induction of long-term potentiation. *Neuron* 34: 127–138.
24. Skeberdis VA, Chevaleyre V, Lau CG, Goldberg JH, Pettit DL, et al. (2006) Protein kinase A regulates calcium permeability of NMDA receptors. *Nat Neurosci* 9: 501–510. doi:10.1038/nn1664.
25. Flores-Hernández J, Cepeda C, Hernández-Echeagaray E, Calvert CR, Jokel ES, et al. (2002) Dopamine enhancement of NMDA currents in dissociated medium-sized striatal neurons: role of D1 receptors and DARPP-32. *J Neurophysiol* 88: 3010–3020. doi:10.1152/jn.00361.2002.
26. Buhrman G, Senthil Kumar VS, Cirit M, Haugh JM, Mattos C (2011) Allosteric modulation of Ras-GTP is linked to signal transduction through RAF kinase. *J Biol Chem* 286: 3323–3331. doi:10.1074/jbc.M110.193854.
27. Yasuda R, Harvey CD, Zhong H, Sobczyk A, van Aelst L, et al. (2006) Supersensitive Ras activation in dendrites and spines revealed by two-photon fluorescence lifetime imaging. *Nat Neurosci* 9: 283–291. doi:10.1038/nn1635.

28. Harvey CD, Yasuda R, Zhong H, Svoboda K (2008) The spread of Ras activity triggered by activation of a single dendritic spine. *Science* 321: 136–140. doi:10.1126/science.1159675.
29. Sivakumaran S, Hariharaputran S, Mishra J, Bhalla US (2003) The Database of Quantitative Cellular Signaling: management and analysis of chemical kinetic models of signaling networks. *Bioinformatics* 19: 408–415. doi:10.1093/bioinformatics/btf860.
30. Ajay SM, Bhalla US (2004) A role for ERKII in synaptic pattern selectivity on the time-scale of minutes. *Eur J Neurosci* 20: 2671–2680. doi:10.1111/j.1460-9568.2004.03725.x.
31. Letourneux C, Rocher G, Porteu F (2006) B56-containing PP2A dephosphorylate ERK and their activity is controlled by the early gene IEX-1 and ERK. *EMBO J* 25: 727–738. doi:10.1038/sj.emboj.7600980.
32. Zhou B, Wang Z-X, Zhao Y, Brautigan DL, Zhang Z-Y (2002) The specificity of extracellular signal-regulated kinase 2 dephosphorylation by protein phosphatases. *J Biol Chem* 277: 31818–31825. doi:10.1074/jbc.M203969200.
33. Sgambato V, Pagès C, Rogard M, Besson M, Caboche J (1998) Extracellular signal-regulated kinase (ERK) controls immediate early gene induction on corticostriatal stimulation. *J Neurosci* 18: 8814–8825.
34. Falkenburger BH, Jensen JB, Hille B (2010) Kinetics of M1 muscarinic receptor and G protein signaling to phospholipase C in living cells. *J Gen Physiol* 135: 99–114. doi:10.1085/jgp.200910345.
35. Marcellino D, Kehr J, Agnati LF, Fuxe K (2011) Increased affinity of dopamine for D(2) -like versus D(1) -like receptors. Relevance for volume transmission in interpreting PET findings. *Synapse* 203: 196–203. doi:10.1002/syn.21501.
36. Chan P, Gabay M, Wright F a, Kan W, Oner SS, et al. (2011) Purification of heterotrimeric G protein alpha subunits by GST-Ric-8 association: primary characterization of purified G alpha(olf). *J Biol Chem* 286: 2625–2635. doi:10.1074/jbc.M110.178897.
37. Guo Z, Ahmadian MR, Goody RS (2005) Guanine Nucleotide Exchange Factors Operate by a Simple Allosteric Competitive Mechanism. *Biochemistry* 44: 15423–15429. doi:10.1021/bi0518601.
38. Lenzen C, Cool RH, Prinz H, Wittinghofer A (1998) Kinetic Analysis by Fluorescence of the Interaction between Ras and the Catalytic Domain of the Guanine Nucleotide Exchange Factor Cdc25Mm. *Biochemistry* 2960: 7420–7430.
39. Traut TW (1994) Physiological concentrations of purines and pyrimidines. *Mol Cell Biochem* 140: 1–22.
40. Hein P, Rochais F, Hoffmann C, Dorsch S, Nikolaev VO, et al. (2006) Gs activation is time-limiting in initiating receptor-mediated signaling. *J Biol Chem* 281: 33345–33351. doi:10.1074/jbc.M606713200.



41. Masuho I, Xie K, Martemyanov K a (2013) Macromolecular composition dictates receptor and G protein selectivity of regulator of G protein signaling (RGS) 7 and 9-2 protein complexes in living cells. *J Biol Chem* 288: 25129–25142. doi:10.1074/jbc.M113.462283.
42. Lavezzari G, Mccallum J, Lee R, Roche KW (2003) Differential binding of the AP-2 adaptor complex and PSD-95 to the C-terminus of the NMDA receptor subunit NR2B regulates surface expression. *Neuropharmacology* 45: 729–737. doi:10.1016/S0028-3908(03)00308-3.
43. Lavezzari G, Mccallum J, Dewey CM, Roche KW (2004) Subunit-Specific Regulation of NMDA Receptor Endocytosis. *J Neurosci* 24: 6383–6391. doi:10.1523/JNEUROSCI.1890-04.2004.
44. Prybylowski K, Chang K, Sans N, Kan L, Vicini S, et al. (2005) The synaptic localization of NR2B-containing NMDA receptors is controlled by interactions with PDZ proteins and AP-2. *Neuron* 47: 845–857. doi:10.1016/j.neuron.2005.08.016.
45. Wang J, Carnicella S, Phamluong K, Jeanblanc J, Ronesi JA, et al. (2007) Ethanol Induces Long-Term Facilitation of NR2B-NMDA Receptor Activity in the Dorsal Striatum: Implications for Alcohol Drinking Behavior. *J Neurosci* 27: 3593–3602. doi:10.1523/JNEUROSCI.4749-06.2007.
46. Li Y-C, Liu G, Hu J-L, Gao W-J, Huang Y-Q (2010) Dopamine D1 receptor-mediated enhancement of NMDA receptor trafficking requires rapid PKC-dependent synaptic insertion in the prefrontal neurons. *J Neurochem* 114: 62–73. doi:10.1111/j.1471-4159.2010.06720.x.
47. Spoerner M, Hozsa C, Poetzl J a, Reiss K, Ganser P, et al. (2010) Conformational states of human rat sarcoma (Ras) protein complexed with its natural ligand GTP and their role for effector interaction and GTP hydrolysis. *J Biol Chem* 285: 39768–39778. doi:10.1074/jbc.M110.145235.
