# Supplementary material for: Segregation and Crosstalk of D1 Receptor-Mediated Activation of ERK in Striatal Medium Spiny Neurons upon Acute Administration of Psychostimulants
Source: PLOS journal article supplement (doi:10.1371/journal.pcbi.1003445), 2014-01-30
Supplement: S8 (10.1371/journal.pcbi.1003445.s008) [file journal.pcbi.1003445.s008]

301 Moved Permanently

# Moved Permanently

The document has moved here.

---

Apache Server at www.ploscompbiol.org Port 80
